# Supplementary material for: Supercritically exfoliated ultrathin vanadium pentoxide nanosheets with high rate capability for lithium batteries
Source: Royal Society of Chemistry journal article supplement (doi:10.1039/c3cp52624k), 2013-01-01
Supplement: c3cp52624k.pdf [file c3cp52624k.pdf]

Supplementary Information for

## **Supercritically Exfoliated Ultrathin Vanadium Pentoxide Nanosheets with High Rate Capability for Lithium Batteries†**

**Qinyou An,<sup>a,‡</sup> Qiulong Wei,<sup>a,‡</sup> Liqiang Mai,<sup>\*a</sup> Jiayang Fei,<sup>b</sup> Xu Xu,<sup>a</sup> Yunlong Zhao,<sup>a</sup>  
Mengyu Yan,<sup>a</sup> Pengfei Zhang<sup>a</sup> and Shizhe Huang<sup>a</sup>**

<sup>a</sup> State Key Laboratory of Advanced Technology for Materials Synthesis and Processing,  
WUT-Harvard Joint Nano Key Laboratory, Wuhan University of Technology, Wuhan, 430070, P.  
R. China. Fax: +86-027-87644867; Tel: +86-027-87467595; E-mail: mlq518@whut.edu.cn

<sup>b</sup> Department of Materials Science and Engineering, University of Pennsylvania, Philadelphia,  
Pennsylvania 19104, United States.

† These authors contributed equally to this work.

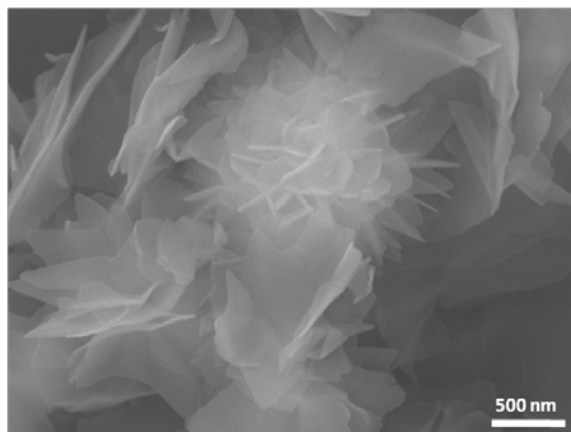

**Figure S1.** SEM images of the products synthesized under 10 h solvothermal reaction.

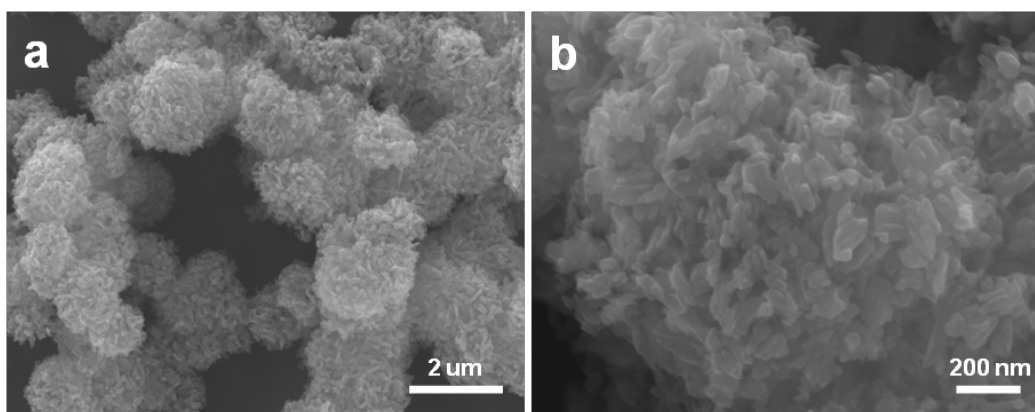

**Figure S2.** SEM images of V<sub>2</sub>O<sub>5</sub> microspheres obtained by annealing the solvothermally prepared microflowers (duration 6 h) in air at 400 °C for 2 h.

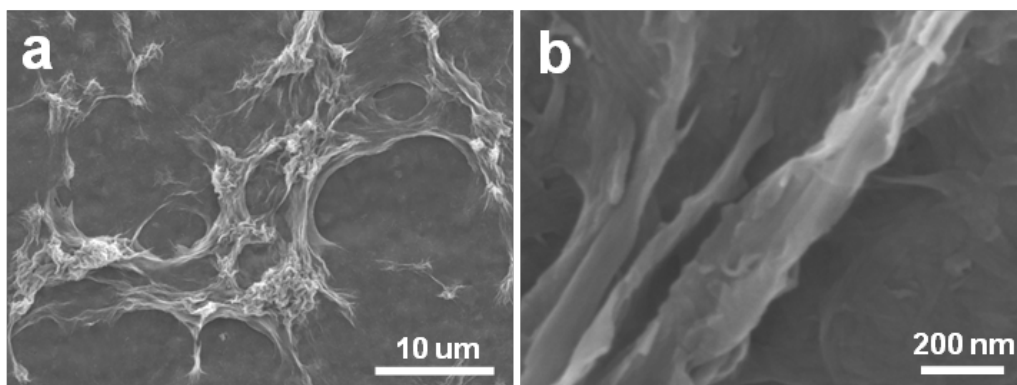

**Figure S3.** SEM images of the V<sub>2</sub>O<sub>5</sub> ethanol-gels after drying at 70 °C.

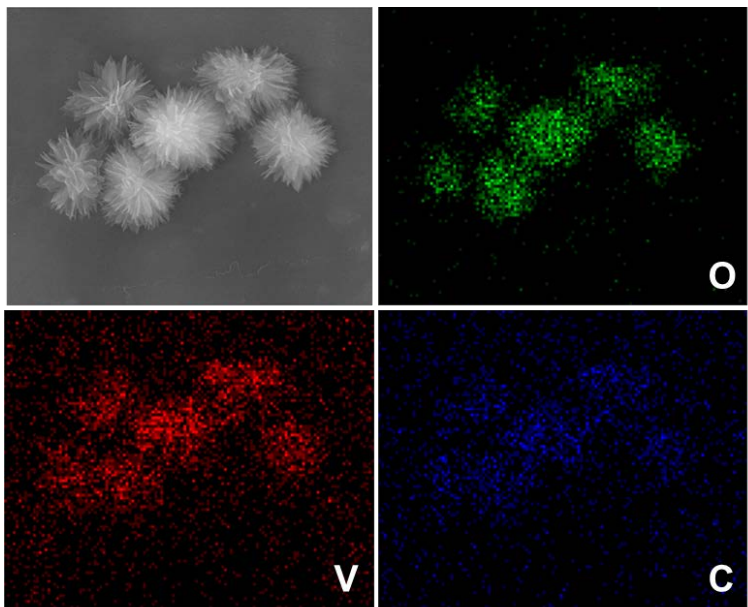

**Figure S4.** Energy dispersive X-ray spectrometric (EDS) mapping of the  $\text{V}_2\text{O}_5$  microflowers obtained by solvothermal treatment (duration 6 h).

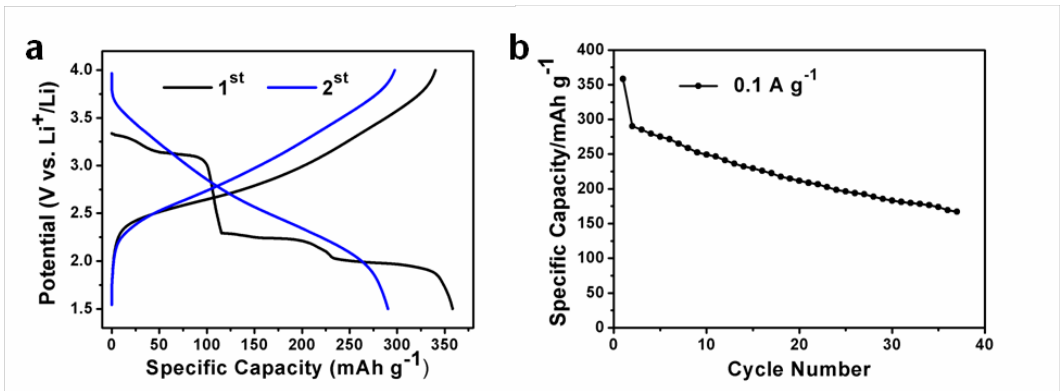

**Figure S5.** (a) Charge-discharge curves and (b) the cycling performance of the ultrathin  $\text{V}_2\text{O}_5$  nanosheets, at the current density of  $100 \text{ mAh g}^{-1}$  and the charge/discharge potential range from 1.5 to 4.0 V.

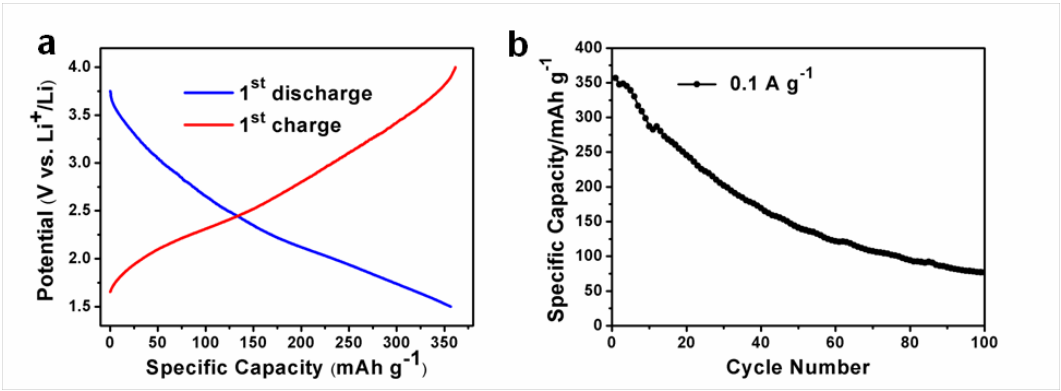

**Figure S6.** (a) Charge-discharge curves and (b) the cycling performance of the amorphous vanadium oxide ultrathin nanosheets, at the current density of  $100 \text{ mAh g}^{-1}$  and the charge/discharge potential range from 1.5 to 4.0 V. A high initial capacity above  $350 \text{ mAh g}^{-1}$  is achieved, but the cycleability is poor.

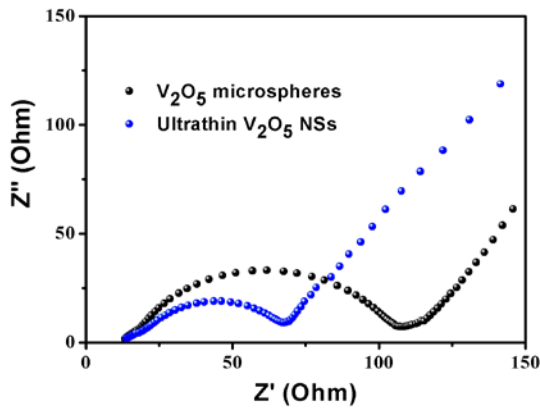

**Figure S7.** AC impedance plots of ultrathin  $\text{V}_2\text{O}_5$  nanosheets and  $\text{V}_2\text{O}_5$  microspheres cathodes, from 0.01 Hz to 100 kHz.

**Table S1.** The electrochemical performances (cycling performance at relevant current rate or density, and rate capability) of the V<sub>2</sub>O<sub>5</sub> NSs and the reported V<sub>2</sub>O<sub>5</sub> materials.

| Sample                                                               | Voltage range | Capacity (mAh g <sup>-1</sup> ) / Cycle number | Current rate or density        | Rate capacity (mAh g <sup>-1</sup> ) at relevant Current rate or density |
|----------------------------------------------------------------------|---------------|------------------------------------------------|--------------------------------|--------------------------------------------------------------------------|
| V <sub>2</sub> O <sub>5</sub> microspheres <sup>1</sup>              | 2.5 – 4 V     | ~ 135 / 100                                    | 0.2 C                          | 92.2 at 15 C                                                             |
| V <sub>2</sub> O <sub>5</sub> / CNTs composites <sup>2</sup>         | 2 – 4 V       | 104 / 200                                      | 5 C                            | 169 at 10 C                                                              |
| Porous V <sub>2</sub> O <sub>5</sub> nanotubes <sup>3</sup>          | 2.5 – 4 V     | 105 / 250                                      | 2 A g <sup>-1</sup> (~ 13.5 C) | 62.5 at 15 A g <sup>-1</sup> (~101 C)                                    |
| 3D porous V <sub>2</sub> O <sub>5</sub> <sup>4</sup>                 | 2.5 – 4 V     | 110 / 200                                      | 10 C                           | 86.7 at 56 C (Charge at 1C)                                              |
| Yolk-shelled V <sub>2</sub> O <sub>5</sub> microspheres <sup>5</sup> | 2–4 V         | 227 / 50                                       | 1 C                            | ~150 at 8C                                                               |
| As-prepared V <sub>2</sub> O <sub>5</sub> NSs in this work           | 2.4-4 V       | 108 / 200                                      | 10 C                           | 100 at 15 C                                                              |

#### References

1. Wang, S. Q.; Lu, Z. D.; Wang, D.; Li, C. G.; Chen, C. H.; Yin, Y. D. *J. Mater. Chem.* **2011**, *21*, 6365.
2. Jia, X. L.; Chen, Z.; Suwarnasarn, A.; Rice, L.; Wang, X. L.; Sohn, H.; Zhang, Q.; Wu, B. M.; Wei, F.; Lu, Y. F. *Energy Environ. Sci.* **2012**, *5*, 6845.
3. Wang, H. G.; Ma, D. L.; Huang, Y.; Zhang, X. B. *Chem. Eur. J.* **2012**, *18*, 8987.
4. Wang, S. Q.; Li, S. R.; Sun, Y.; Feng, X. Y.; Chen, C. H. *Energy Environ. Sci.* **2011**, *4*, 2854.
5. Pan, A. Q.; Wu, H. B.; Yu, L.; Lou, X. W. *Angew. Chem. Int. Ed.* **2013**, *52*, 2226.
